# Supplementary material
Source: Research Square preprint supplement (doi:10.21203/rs.3.rs-9762119/v1)
Supplement: Supplementary file 1 [file 8a6ae11b8db93b73f2816deb.xlsx]

## Sheet: 突变亚组比较
组别	SEX	AGE	AGE2	KIT11	KIT9	KIT17	KIT13	PDGFRa	Y3	CD117	Dog-1	CD34	S100	S10	SMA	Ki67	SDH	V	D	S6	B2	X1	X2	X3	X4	X5	X6
1	1	60	5	1	0	0	0	0	97	2	2	2	2	2	2	0.4	2	2	2	2	2	1	12	3	6	1	4
1	1	70	6	1	0	0	0	0	96	1	1	1	0	0	0	0.15	1	1	1	0	1	1	2.2	1	6	0	2
1	1	59	4	1	0	0	0	0	21	2	2	2	2	2	2	0.16	2	2	2	2	2	3	0.5	3	4	0	1
1	1	61	5	1	0	0	0	0	21	1	1	1	0	0	1	0.1	1	0	0	0	1	1	3	1	6	0	2
1	1	67	5	1	0	0	0	0	95	1	1	1	0	0	1	0.2	1	1	1	1	1	1	3.8	1	2	0	2
1	0	43	3	1	0	0	0	0	94	1	1	1	0	0	1	0.1	1	1	0	0	0	1	3.7	1	5	0	2
1	0	59	4	1	0	0	0	0	93	2	2	2	2	2	2	0.16	2	2	2	2	2	1	7	3	4	1	4
1	1	73	6	1	0	0	0	0	92	1	1	1	2	2	2	0.3	2	1	2	2	2	1	7	3	6	1	4
1	1	62	5	1	0	0	0	0	8	1	1	1	0	0	1	0.08	1	1	0	0	1	2	5.7	1	6	1	4
1	1	67	5	1	0	0	0	0	8	1	1	1	0	0	0	0.01	1	1	0	0	1	1	6.8	1	5	0	2
1	0	59	4	1	0	0	0	0	8	1	1	1	0	0	0	0.01	1	1	0	0	1	1	3	1	2	0	2
1	0	62	5	1	0	0	0	0	8	2	2	2	2	2	2	0.16	2	2	2	2	2	1	7	2	4	1	4
1	0	66	5	1	0	0	0	0	8	1	1	1	0	0	1	0.15	1	1	1	1	1	1	3	1	7	0	3
1	1	52	4	1	0	0	0	0	91	1	1	1	0	2	0	0.2	1	0	0	2	2	1	3.5	1	8	0	3
1	1	70	6	1	0	0	0	0	90	1	1	1	0	0	1	0.3	1	1	1	2	2	2	6.5	1	6	1	4
1	1	42	3	1	0	0	0	0	4	1	1	1	0	0	0	0.04	1	1	0	0	1	2	2.8	1	3	0	2
1	1	80	7	1	0	0	0	0	4	1	1	1	0	0	0	0.2	1	1	0	0	1	2	8	1	9	1	4
1	1	65	5	1	0	0	0	0	4	1	1	1	0	0	0	0.05	2	2	0	2	1	2	3.5	1	7	1	4
1	0	65	5	1	0	0	0	0	4	1	1	1	0	2	1	0.03	2	1	2	2	2	2	3.8	2	7	1	4
1	1	66	5	1	0	0	0	0	4	1	1	1	0	0	1	0.04	2	1	1	2	2	1	0.5	1	1	0	1
1	0	65	5	1	0	0	0	0	1	1	1	1	0	0	0	0.1	2	2	0	2	2	1	2	1	8	0	2
1	0	65	5	1	0	0	0	0	1	1	1	1	0	0	0	0.1	2	2	0	2	2	1	2	1	8	0	2
1	0	71	6	1	0	0	0	0	4	1	1	1	0	0	0	0.1	1	1	0	0	1	1	3.5	1	6	0	2
1	1	45	3	1	0	0	0	0	4	1	1	1	0	0	0	0.1	0	1	0	1	0	3	2	2	4	0	2
1	1	41	3	1	0	0	0	0	4	1	0	0	0	2	1	0.6	2	1	0	2	2	1	11.5	2	4	1	4
1	0	53	4	1	0	0	0	0	4	1	1	1	0	0	0	0.05	0	0	0	1	1	1	0.3	1	4	0	2
1	0	61	5	1	0	0	0	0	4	1	1	1	0	0	0	0.1	1	1	0	1	1	1	4	1	28.4	1	4
1	0	58	4	1	0	0	0	0	4	1	1	1	0	0	0	0.1	1	1	0	2	1	1	11	1	6	1	4
1	1	62	5	1	0	0	0	0	4	1	1	1	0	0	0	0.2	1	1	0	0	1	2	7	1	6	1	4
1	1	74	6	1	0	0	0	0	4	1	1	1	0	0	1	0.2	1	1	0	0	1	1	3.8	1	7	0	3
1	0	34	2	1	0	0	0	0	20	1	1	1	0	2	0	0.2	1	1	0	2	2	3	7	2	2.5	1	4
1	1	67	5	1	0	0	0	0	20	1	1	1	0	0	0	0.3	1	1	0	2	2	1	7	1	14	1	4
1	0	77	6	1	0	0	0	0	89	2	2	2	2	2	2	0.16	2	2	2	2	2	1	6	2	6	0	3
1	1	53	4	1	0	0	0	0	88	1	1	1	0	0	0	0.4	1	1	0	0	1	1	14	2	4	1	4
1	0	62	5	1	0	0	0	0	87	1	1	1	0	2	0	0.1	1	1	0	2	1	1	2	1	5	0	2
1	1	74	6	1	0	0	0	0	86	1	1	1	0	0	1	0.2	1	1	0	2	1	1	3.5	1	3	0	2
1	0	55	4	1	0	0	0	0	85	1	1	1	0	0	0	0.2	1	2	0	0	2	1	3.6	2	4	0	2
1	0	55	4	1	0	0	0	0	84	1	1	1	0	0	0	0.1	0	1	0	0	2	1	17	1	9	1	4
1	0	59	4	1	0	0	0	0	83	1	1	1	0	2	0	0.15	2	2	0	2	1	1	3.5	1	6	0	3
1	1	75	6	1	0	0	0	0	1	1	1	1	0	2	0	0.2	0	1	2	2	2	1	13	2	6	1	4
1	1	75	6	1	0	0	0	0	1	1	1	1	0	2	0	0.2	0	1	2	2	2	1	13	2	6	1	4
1	0	61	5	1	0	0	0	0	82	1	1	1	0	2	0	0.03	2	2	2	2	2	1	0.6	1	2	0	1
1	0	62	5	1	0	0	0	0	81	1	1	1	0	0	0	0.08	1	1	1	0	1	1	4	1	11	1	4
1	1	41	3	1	0	0	0	0	80	1	1	1	0	0	1	0.2	1	1	0	0	1	2	10	2	25	1	4
1	0	75	6	1	0	0	0	0	79	1	1	1	0	0	0	0.65	2	1	0	2	2	2	8	3	6	1	4
1	1	68	5	1	0	0	0	0	78	1	1	1	0	0	1	0.05	2	1	0	2	2	2	2.5	1	4	0	3
1	1	32	2	1	0	0	0	0	77	1	1	0	0	0	1	0.2	1	1	0	0	1	2	4.5	1	5	0	3
1	0	47	3	1	0	0	0	0	76	2	2	2	2	2	2	0.16	2	2	2	2	2	3	7	2	4	1	4
1	1	66	5	1	0	0	0	0	75	1	1	0	0	0	1	0.4	1	2	0	2	2	1	17.8	2	6	1	4
1	1	61	5	1	0	0	0	0	74	1	1	1	1	0	1	0.1	0	1	0	0	1	4	4.5	2	7	0	3
1	0	58	4	1	0	0	0	0	19	1	1	0	0	0	0	0.1	1	1	0	0	1	2	11	1	4	1	4
1	1	50	4	1	0	0	0	0	19	1	1	1	0	0	0	0.1	2	1	2	1	1	1	6	1	16.6	1	4
1	0	61	5	1	0	0	0	0	5	2	2	2	2	2	2	0.16	2	2	2	2	2	1	4	2	4	0	2
1	1	56	4	1	0	0	0	0	5	1	1	0	0	0	1	0.01	1	1	0	0	1	2	12	1	4	1	4
1	0	73	6	1	0	0	0	0	5	1	1	1	0	0	0	0.15	1	2	0	2	2	1	4	1	8	0	3
1	1	61	5	1	0	0	0	0	5	2	2	2	2	2	2	0.16	2	2	2	2	2	1	2.5	2	4	0	2
1	1	63	5	1	0	0	0	0	5	1	1	0	0	0	1	0.07	2	1	0	0	1	3	11	2	4	1	4
1	0	54	4	1	0	0	0	0	5	1	1	1	0	0	0	0.1	2	1	0	0	1	1	10	1	8	1	4
1	1	74	6	1	0	0	0	0	5	1	1	1	0	0	0	0.05	1	1	0	0	1	1	1.2	1	6	0	2
1	0	68	5	1	0	0	0	0	1	1	1	0	0	2	0	0.15	1	1	1	2	2	1	2	2	4	0	2
1	0	68	5	1	0	0	0	0	1	1	1	0	0	2	0	0.15	1	1	1	2	2	1	2	2	4	0	2
1	0	71	6	1	0	0	0	0	5	1	1	1	0	0	1	0.2	2	1	0	0	2	5	9	2	30	1	4
1	1	60	5	1	0	0	0	0	5	2	2	2	2	2	2	0.16	2	2	2	2	2	1	7	2	12	1	4
1	1	73	6	1	0	0	0	0	73	1	1	0	0	0	0	0.1	1	1	0	2	2	1	10.9	1	9	1	4
1	0	62	5	1	0	0	0	0	72	1	1	1	0	0	1	0.05	0	1	0	0	1	2	4	1	1	0	2
1	1	66	5	1	0	0	0	0	1	1	1	1	0	0	0	0.3	1	1	1	2	2	3	12	1	38	1	4
1	1	66	5	1	0	0	0	0	1	1	1	1	0	0	0	0.3	1	1	1	2	2	3	12	1	38	1	4
1	0	73	6	1	0	0	0	0	71	2	2	2	2	2	2	0.16	2	2	2	2	2	1	2	2	6	0	2
1	1	78	6	1	0	0	0	0	70	2	2	2	2	2	2	0.16	2	2	2	2	2	2	6	2	6	0	3
1	0	58	4	1	0	0	0	0	5	1	1	1	0	0	0	0.1	1	0	0	2	2	1	18.5	1	9	1	4
1	1	54	4	1	0	0	0	0	11	1	1	1	0	0	0	0.1	1	1	0	2	2	1	3.6	1	5	0	2
1	0	61	5	1	0	0	0	0	11	1	1	1	0	0	0	0.1	1	1	0	0	1	1	2.8	1	3	0	2
1	1	47	3	1	0	0	0	0	11	1	1	1	0	0	0	0.15	1	1	0	0	1	1	8	1	3	0	3
1	0	72	6	1	0	0	0	0	7	1	1	1	0	0	0	0.1	1	1	0	2	2	1	2.8	1	6	0	2
1	1	52	4	1	0	0	0	0	7	2	2	2	2	2	2	0.16	2	2	2	2	2	1	7	2	4	1	4
1	0	46	3	1	0	0	0	0	7	1	1	1	0	0	0	0.1	1	2	0	2	2	1	4	1	7	0	2
1	0	47	3	1	0	0	0	0	7	1	1	1	0	0	1	0.1	1	1	0	1	1	1	0.8	1	4	0	2
1	0	53	4	1	0	0	0	0	7	1	1	0	0	0	0	0.4	2	1	0	2	2	1	3	3	80.6	1	4
1	1	56	4	1	0	0	0	0	10	1	1	0	0	0	0	0.2	0	1	0	0	1	2	7.8	1	14	1	4
1	1	78	6	1	0	0	0	0	10	1	1	0	0	2	0	0.08	2	2	0	2	2	2	13	1	9	1	4
1	1	74	6	1	0	0	0	0	10	1	1	1	0	0	0	0.1	1	1	0	0	1	1	7.5	1	9.5	1	4
1	0	75	6	1	0	0	0	0	10	1	1	1	0	0	0	0.08	1	1	0	0	1	1	3.8	1	14.2	1	4
1	0	59	4	1	0	0	0	0	3	1	1	1	0	0	1	0.04	1	2	0	2	2	2	4.5	1	6	0	3
1	0	52	4	1	0	0	0	0	1	1	1	0	0	0	1	0.2	1	1	1	0	1	1	7	2	4	1	4
1	0	50	4	1	0	0	0	0	3	1	1	1	0	0	0	0.3	1	1	0	0	1	3	2	2	4	0	1
1	0	60	5	1	0	0	0	0	3	1	1	1	0	0	0	0.3	1	1	0	0	1	1	17	1	18	1	4
1	1	56	4	1	0	0	0	0	3	2	2	2	2	2	2	0.16	2	2	2	2	2	1	7	1	4	1	4
1	0	71	6	1	0	0	0	0	3	1	1	1	0	0	0	0.01	1	1	0	0	0	1	3.3	1	3	0	2
1	1	70	6	1	0	0	0	0	3	1	1	1	0	0	1	0.08	1	1	0	2	1	1	2.5	1	6	0	2
1	1	58	4	1	0	0	0	0	3	0	1	0	0	0	1	0.15	0	1	0	0	1	2	2	1	4	0	2
1	1	64	5	1	0	0	0	0	3	1	1	1	0	0	0	0.1	2	1	0	1	1	1	4.5	1	4	0	2
1	1	79	6	1	0	0	0	0	3	1	1	1	0	0	0	0.1	1	1	0	1	1	1	2.5	1	6	0	2
1	1	64	5	1	0	0	0	0	3	1	1	1	0	0	0	0.08	1	1	0	0	1	1	4.8	1	6	0	2
1	1	50	4	1	0	0	0	0	3	1	1	1	0	0	0	0.2	1	1	0	0	1	1	7	1	7	1	4
1	0	83	7	1	0	0	0	0	3	1	1	1	0	0	0	0.15	1	2	0	0	1	1	6	1	6	0	3
1	1	62	5	1	0	0	0	0	3	2	2	2	2	2	2	0.16	2	2	2	2	2	1	7	1	4	1	4
1	0	54	4	1	0	0	0	0	3	1	1	1	0	0	0	0.1	1	1	0	1	1	1	4.5	1	4	0	2
1	0	68	5	1	0	0	0	0	69	1	1	0	0	2	1	0.05	2	0	2	2	2	3	11.5	1	4	1	4
1	0	64	5	1	0	0	0	0	68	1	1	1	0	2	0	0.15	2	1	1	2	2	2	2	1	4	0	2
1	0	57	4	1	0	0	0	0	18	2	2	2	2	2	2	0.16	2	2	2	2	2	2	7	1	4	1	4
1	0	61	5	1	0	0	0	0	18	1	1	1	0	2	1	0.02	1	2	0	2	2	1	4.8	1	7	0	2
1	1	59	4	1	0	0	0	0	67	1	1	1	0	0	0	0.05	1	1	0	1	1	1	2.4	1	6	0	2
1	0	67	5	1	0	0	0	0	66	1	1	1	0	0	0	0.1	2	2	0	2	2	1	4	1	4	0	2
1	0	66	5	1	0	0	0	0	65	1	1	1	0	0	0	0.05	1	1	0	1	1	1	13	1	4	1	4
1	1	53	4	1	0	0	0	0	64	1	1	1	0	0	0	0.1	1	1	0	0	1	3	3	1	11	1	4
1	0	66	5	1	0	0	0	0	63	1	1	1	0	0	1	0.1	1	1	1	0	2	1	12	2	3	1	4
1	1	52	4	1	0	0	0	0	1	2	2	2	2	2	2	0.16	2	2	2	2	2	2	7	1	4	1	4
1	0	52	4	1	0	0	0	0	61	1	1	1	0	0	1	0.05	2	2	0	0	2	2	13.4	1	2	1	4
1	0	46	3	1	0	0	0	0	62	1	1	1	2	2	0	0.03	2	2	0	2	1	1	1.5	1	3	0	1
1	1	58	4	1	0	0	0	0	9	1	1	1	0	2	1	0.1	2	2	0	2	2	1	4.8	1	7	0	3
1	1	51	4	1	0	0	0	0	9	1	1	1	0	0	0	0.05	1	1	0	0	1	1	10.5	1	3	1	4
1	1	53	4	1	0	0	0	0	9	2	2	2	2	2	2	0.16	2	2	2	2	2	1	7	1	4	1	4
1	0	58	4	1	0	0	0	0	9	1	1	1	0	0	0	0.05	1	1	0	2	2	3	4	1	4	0	2
1	0	71	6	1	0	0	0	0	17	1	1	1	0	0	0	0.05	2	2	0	0	2	1	6.5	1	6	0	3
1	1	57	4	1	0	0	0	0	17	2	2	2	2	2	2	0.16	2	2	2	2	2	1	7	1	4	1	4
1	0	76	6	1	0	0	0	0	60	1	1	1	0	0	1	0.05	0	1	0	0	0	1	6	1	6	0	3
1	1	62	5	1	0	0	0	0	1	1	1	0	0	2	1	0.2	2	2	0	0	2	1	7	1	4	1	4
1	0	65	5	1	0	0	0	0	59	1	1	1	0	0	1	0.1	2	1	0	0	1	2	12	1	4	1	4
1	0	69	5	1	0	0	0	0	58	2	2	2	2	2	2	0.16	2	2	2	2	2	1	7	1	4	1	4
1	1	54	4	1	0	0	0	0	6	2	2	2	2	2	2	0.16	2	2	2	2	2	1	6.5	1	15	1	4
1	1	57	4	1	0	0	0	0	6	1	1	1	2	2	1	0.6	2	1	0	2	2	1	6.7	1	6	1	4
1	1	61	5	1	0	0	0	0	1	1	1	1	0	0	1	0.1	0	1	0	0	2	2	5.5	1	7	1	4
1	1	59	4	1	0	0	0	0	6	1	1	1	0	0	0	0.2	1	1	0	0	1	3	1	1	4	0	1
1	1	60	5	1	0	0	0	0	6	1	1	1	2	2	2	0.3	1	1	2	2	2	1	16	1	4	1	4
1	1	74	6	1	0	0	0	0	6	1	1	1	0	0	0	0.06	1	1	0	1	1	2	6.5	3	7.1	1	4
1	0	39	2	1	0	0	0	0	57	1	1	1	0	2	0	0.03	1	2	0	2	2	1	2	1	3	0	1
1	1	58	4	1	0	0	0	0	56	1	1	1	0	2	0	0.5	1	1	0	1	1	1	22	1	4	1	4
1	0	57	4	1	0	0	0	0	55	1	1	1	0	0	0	0.02	1	1	0	0	1	1	4	1	4	0	2
1	0	71	6	1	0	0	0	0	16	1	1	1	0	0	0	0.2	1	1	1	2	1	1	4	1	6	0	3
1	0	58	4	1	0	0	0	0	16	1	1	1	0	0	0	0.5	2	1	0	2	1	2	11	1	4	1	4
1	1	75	6	1	0	0	0	0	15	1	1	1	0	0	0	0.2	1	1	0	0	1	1	7	1	16	1	4
1	0	50	4	1	0	0	0	0	15	1	1	1	0	0	1	0.1	0	1	0	0	1	4	6.8	1	5	1	4
1	0	50	4	1	0	0	0	0	54	1	1	1	0	0	0	0.03	1	1	0	2	1	1	5	1	4.7	0	3
1	0	69	5	1	0	0	0	0	14	1	1	1	0	0	1	0.1	2	1	2	2	2	2	2.2	1	6	0	3
1	1	58	4	1	0	0	0	0	14	2	2	2	2	2	2	0.16	2	2	2	2	2	3	7	1	6	1	4
1	0	69	5	1	0	0	0	0	53	2	2	2	2	2	2	0.16	2	2	2	2	2	3	7	1	4	1	4
1	1	42	3	1	0	0	0	0	2	2	2	2	2	2	2	0.16	2	2	2	2	2	2	4	1	4	0	2
1	1	57	4	1	0	0	0	0	2	1	1	1	0	0	0	0.3	2	1	0	2	2	1	0.6	1	4	0	1
1	1	55	4	1	0	0	0	0	2	1	1	1	1	0	0	0.3	1	1	0	0	1	1	8	1	40	1	4
1	0	59	4	1	0	0	0	0	2	1	1	1	0	0	0	0.05	1	2	2	2	2	1	2.5	1	4	0	2
1	0	52	4	1	0	0	0	0	2	1	1	1	0	2	1	0.3	2	1	0	2	2	1	15	1	5	1	4
1	1	75	6	1	0	0	0	0	2	1	1	1	0	2	1	0.02	2	2	2	2	2	4	10.5	1	6	1	4
1	1	51	4	1	0	0	0	0	2	1	1	1	0	0	0	0.03	1	0	0	0	1	3	4.6	1	6	0	3
1	1	59	4	1	0	0	0	0	2	1	1	1	0	2	1	0.1	2	2	0	2	2	3	8	1	10	1	4
1	0	60	5	1	0	0	0	0	2	1	1	1	0	0	1	0.4	2	1	0	2	2	3	7	1	4	1	4
1	0	59	4	1	0	0	0	0	2	1	1	1	0	0	0	0.2	1	1	0	0	0	1	22	1	4	1	4
1	0	66	5	1	0	0	0	0	2	2	2	2	2	2	2	0.16	2	2	2	2	2	1	4	1	4	0	2
1	1	64	5	1	0	0	0	0	2	2	2	2	2	2	2	0.16	2	2	2	2	2	1	4	1	4	0	2
1	1	50	4	1	0	0	0	0	2	1	1	1	0	0	0	0.02	1	1	0	1	1	1	3.1	2	4	0	2
1	0	59	4	1	0	0	0	0	2	0	1	0	0	0	0	0.2	1	1	0	2	0	1	7	1	14	1	4
1	1	30	2	1	0	0	0	0	2	1	1	1	0	0	0	0.05	1	1	0	1	1	1	3	1	3	0	2
1	0	54	4	1	0	0	0	0	1	1	1	1	0	1	0	0.1	1	1	1	0	1	1	4	1	4	0	2
1	0	55	4	1	0	0	0	0	52	1	1	1	0	0	1	0.1	2	2	1	2	2	1	2.6	1	8	0	3
1	1	82	7	1	0	0	0	0	51	1	1	1	0	0	1	0.1	2	1	0	0	1	2	3.5	1	6	0	2
1	1	61	5	1	0	0	0	0	50	1	1	1	0	0	0	0.08	1	1	0	2	2	3	4	1	4	0	2
1	1	51	4	1	0	0	0	0	49	1	1	1	0	0	1	0.7	1	1	1	0	1	1	11	1	7	1	4
1	0	37	2	1	0	0	0	0	48	1	1	1	0	0	0	0.15	2	2	0	2	2	3	6	1	7	1	4
1	1	51	4	1	0	0	0	0	47	1	1	1	0	0	1	0.1	1	1	0	0	1	1	0.5	2	4	0	1
1	1	77	6	1	0	0	0	0	46	1	1	1	0	0	0	0.3	1	1	0	0	1	1	15.3	2	7	1	4
1	1	82	7	1	0	0	0	0	45	1	1	1	0	0	0	0.35	1	0	0	0	0	3	4	3	35	1	4
1	0	76	6	1	0	0	0	0	44	1	1	1	0	0	1	0.04	1	1	1	1	1	2	7	1	6	1	4
1	1	59	4	1	0	0	0	0	43	1	1	1	2	2	0	0.5	1	1	2	2	2	1	16.2	1	6	1	4
1	1	52	4	1	0	0	0	0	42	2	2	2	2	2	2	0.16	2	2	2	2	2	2	0.5	1	4	0	1
1	1	55	4	1	0	0	0	0	41	1	1	1	0	2	0	0.08	2	1	0	2	2	1	3.5	1	4	0	2
1	1	43	3	1	0	0	0	0	40	1	1	1	0	0	0	0.4	0	1	0	0	0	1	15	1	112	1	4
1	0	76	6	1	0	0	0	0	39	1	1	1	0	0	0	0.03	1	1	0	0	2	1	1.5	1	6	0	2
1	1	69	5	1	0	0	0	0	13	1	1	0	0	0	0	0.2	1	1	0	0	1	2	8	1	4	0	3
1	0	51	4	1	0	0	0	0	13	1	1	0	0	0	1	0.04	1	1	1	2	1	3	2.5	1	4	0	2
1	1	47	3	1	0	0	0	0	36	2	2	2	2	2	2	0.16	2	2	2	2	2	1	2.5	1	4	0	2
1	0	65	5	1	0	0	0	0	38	2	2	2	2	2	2	0.16	2	2	2	2	2	1	2.5	1	4	0	2
1	1	68	5	1	0	0	0	0	37	1	1	1	0	2	0	0.13	2	1	0	2	2	1	17.3	1	10	1	4
1	1	61	5	1	0	0	0	0	34	1	1	1	0	0	0	0.05	1	1	0	0	1	1	4.2	1	4	0	2
1	0	70	6	1	0	0	0	0	35	1	1	1	0	0	0	0.05	0	1	0	1	1	1	2	1	9	0	3
1	0	57	4	1	0	0	0	0	33	2	2	2	2	2	2	0.16	2	2	2	2	2	2	2.5	1	4	0	2
1	0	50	4	1	0	0	0	0	32	1	1	1	0	0	0	0.2	0	1	0	0	1	1	5.6	1	3	0	3
1	0	51	4	1	0	0	0	0	1	1	1	1	0	0	0	0.4	1	1	1	1	1	4	7	1	4	1	4
1	1	65	5	1	0	0	0	0	31	1	1	1	0	0	1	0.4	1	1	0	0	1	2	14	1	6	1	4
1	1	71	6	1	0	0	0	0	30	2	2	2	2	2	2	0.16	2	2	2	2	2	1	16.7	1	6	1	4
1	1	57	4	1	0	0	0	0	12	1	1	0	0	0	1	0.05	1	1	0	0	1	2	7	1	9.5	1	4
1	1	80	7	1	0	0	0	0	12	1	1	1	0	0	0	0.3	0	1	0	2	1	1	17	1	6	1	4
1	0	65	5	1	0	0	0	0	29	1	1	1	0	0	0	0.2	1	1	0	0	1	1	9	1	14	1	4
1	0	55	4	1	0	0	0	0	28	1	1	1	0	0	0	0.01	1	1	0	0	1	1	10.8	1	4	1	4
1	1	57	4	1	0	0	0	0	1	1	1	1	0	0	0	0.6	1	1	0	0	1	1	12.5	1	6	1	4
1	1	54	4	1	0	0	0	0	27	1	1	1	0	0	0	0.07	1	1	0	0	1	1	3.5	1	4	0	2
1	0	67	5	1	0	0	0	0	26	1	1	1	0	0	0	0.25	1	1	0	0	1	1	5	1	17	1	4
1	1	83	7	1	0	0	0	0	25	1	1	1	0	0	1	0.4	1	1	0	0	1	3	7.5	1	6	1	4
1	1	78	6	1	0	0	0	0	24	1	1	1	0	0	0	0.04	1	2	0	2	2	1	13.3	1	6	1	4
1	1	84	7	1	0	0	0	0	23	1	1	1	0	0	1	0.03	1	1	1	2	2	1	0.4	1	1	0	1
1	1	73	6	1	0	0	0	0	22	2	2	2	2	2	2	0.16	2	2	2	2	2	1	1.4	1	6	0	2
2	1	62	5	0	1	0	0	0	1	1	1	1	0	2	1	0.1	1	1	2	2	2	1	4.5	2	6	0	3
2	1	52	4	0	1	0	0	0	98	1	1	0	0	2	0	0.2	1	2	0	2	2	2	6	3	22	1	4
2	1	60	5	0	1	0	0	0	98	1	1	1	0	2	0	0.05	2	2	2	2	0	3	1	1	1	0	1
2	1	67	5	0	1	0	0	0	98	1	1	1	0	2	1	0.4	2	1	1	2	2	3	11	3	6	1	4
2	0	69	5	0	1	0	0	0	98	2	2	2	2	2	2	0.16	2	2	2	2	2	2	7	2	4	1	4
2	0	79	6	0	1	0	0	0	98	2	2	2	2	2	2	0.16	2	2	2	2	2	2	6	2	6	0	3
2	0	62	5	0	1	0	0	0	98	1	1	1	2	2	1	0.2	1	1	1	2	2	3	1.8	2	4	0	1
2	0	71	6	0	1	0	0	0	99	1	1	0	0	2	1	0.03	1	2	1	0	2	2	6	2	6	0	3
2	1	63	5	0	1	0	0	0	98	1	0	1	0	0	1	0.3	1	1	0	2	2	2	11	2	4	1	4
2	1	68	5	0	1	0	0	0	98	1	1	1	1	1	1	0.05	1	1	1	2	2	1	1.1	2	4	0	1
2	1	58	4	0	1	0	0	0	98	1	1	1	0	0	0	0.05	2	1	1	2	2	2	2	1	4	0	2
2	1	51	4	0	1	0	0	0	98	2	2	2	2	2	2	0.16	2	2	2	2	2	4	2	1	4	0	1
2	0	61	5	0	1	0	0	0	98	1	1	0	0	0	0	0.04	1	1	0	0	1	2	10.8	1	5	1	4
2	1	51	4	0	1	0	0	0	98	1	1	1	0	0	1	0.05	1	1	0	1	1	2	1.5	1	2	0	1
2	1	63	5	0	1	0	0	0	98	1	1	1	0	0	1	0.3	1	1	0	2	1	2	9	2	10	1	4
2	1	61	5	0	1	0	0	0	98	1	1	1	0	0	0	0.2	1	1	1	1	0	3	0.5	1	4	0	1
2	1	60	5	0	1	0	0	0	98	1	1	1	0	0	1	0.1	1	1	0	0	1	2	5	1	6	0	3
3	0	35	2	0	0	1	0	0	100	1	1	1	0	0	0	0.08	1	1	0	0	1	1	19.5	1	2	1	4
3	0	50	4	0	0	1	0	0	100	1	1	1	0	0	0	0.1	0	2	0	2	2	1	1.5	1	3	0	1
3	1	64	5	0	0	1	0	0	100	2	2	2	2	2	2	0.16	2	2	2	2	2	1	7	1	4	1	4
3	1	37	2	0	0	1	0	0	101	1	1	1	0	0	1	0.1	1	1	0	0	1	1	2.5	1	7.1	0	3
3	1	52	4	0	0	1	0	0	1	2	2	2	2	2	2	0.16	2	2	2	2	2	2	7	1	4	1	4
3	1	62	5	0	0	1	0	0	1	1	1	0	0	2	1	0.2	2	2	0	0	2	1	7	1	4	1	4
3	1	61	5	0	0	1	0	0	1	1	1	1	0	0	1	0.1	0	1	0	0	2	2	5.5	1	7	1	4
3	1	57	4	0	0	1	0	0	1	1	1	1	0	0	0	0.6	1	1	0	0	1	1	12.5	1	6	1	4
4	0	52	4	0	0	0	1	0	1	1	1	0	0	0	1	0.2	1	1	1	0	1	1	7	2	4	1	4
4	1	58	4	0	0	0	1	0	1	2	2	2	2	2	2	0.16	2	2	2	2	2	2	7	2	4	1	4
4	1	58	4	0	0	0	1	0	1	2	2	2	2	2	2	0.16	2	2	2	2	2	2	7	2	4	1	4
4	0	54	4	0	0	0	1	0	1	1	1	1	0	1	0	0.1	1	1	1	0	1	1	4	1	4	0	2
4	0	51	4	0	0	0	1	0	1	1	1	1	0	0	0	0.4	1	1	1	1	1	4	7	1	4	1	4
5	1	66	5	0	0	0	0	1	102	1	1	1	0	2	1	0.1	2	1	0	2	2	1	5	2	22	1	4
5	1	62	5	0	0	0	0	1	1	1	1	1	0	2	1	0.1	1	1	2	2	2	1	4.5	2	6	0	3
5	0	59	4	0	0	0	0	1	102	2	2	2	2	2	2	0.16	2	2	2	2	2	1	14.3	2	4	1	4
5	1	69	5	0	0	0	0	1	102	1	1	1	0	0	1	0.08	1	1	0	0	1	1	3	2	4	0	2
5	0	52	4	0	0	0	0	1	103	1	1	1	0	0	0	0.2	0	1	0	0	1	1	9	2	5	0	3
5	1	65	5	0	0	0	0	1	105	1	1	1	0	0	1	0.1	1	1	0	1	1	1	16	1	12	1	4
5	1	60	5	0	0	0	0	1	104	2	2	2	2	2	2	0.16	2	2	2	2	2	1	7	1	4	1	4
5	1	43	3	0	0	0	0	1	102	1	1	1	0	0	0	0.1	1	1	0	1	1	1	8	3	9.5	1	4
5	0	58	4	0	0	0	0	1	103	1	1	0	0	0	0	0.1	1	1	0	1	1	1	2.5	3	15	0	3
5	1	64	5	0	0	0	0	1	102	1	1	1	0	0	1	0.2	1	1	0	0	1	1	2.5	1	7	0	3
5	1	52	4	0	0	0	0	1	102	1	1	1	0	0	1	0.1	1	2	0	2	2	1	5	1	4	0	2
5	1	61	5	0	0	0	0	1	106	1	1	1	1	0	1	0.2	1	1	1	1	1	1	3	1	2	0	2
