# Supplementary material
Source: Research Square preprint supplement (doi:10.21203/rs.3.rs-9762119/v1)
Supplement: Supplementary file 2 [file 8f9ede57922f6565ce275a1b.xlsx]

## Sheet: GIST
SEX	AGE	AGE2	Y1	Y2	Y3	CD117	Dog-1	CD34	S100	S10	SMA	Ki67	SDH	V	D	S6	B2	X1	X2	X3	X4	X5	X6
1	60	5	1	1	97	2	2	2	2	2	2	0.4	2	2	2	2	2	1	12	3	6	1	4
1	62	5	1	2	1	1	1	1	0	2	1	0.1	1	1	2	2	2	1	4.5	2	6	0	3
1	70	6	1	1	96	1	1	1	0	0	0	0.15	1	1	1	0	1	1	2.2	1	6	0	2
1	59	4	1	1	21	2	2	2	2	2	2	0.16	2	2	2	2	2	3	0.5	3	4	0	1
1	35	2	0	0	0	1	1	1	0	0	0	0.15	0	0	0	2	2	1	8	1	6	1	4
1	52	4	1	2	98	1	1	0	0	2	0	0.2	1	2	0	2	2	2	6	3	22	1	4
1	61	5	1	1	21	1	1	1	0	0	1	0.1	1	0	0	0	1	1	3	1	6	0	2
1	66	5	1	5	102	1	1	1	0	2	1	0.1	2	1	0	2	2	1	5	2	22	1	4
1	67	5	1	1	95	1	1	1	0	0	1	0.2	1	1	1	1	1	1	3.8	1	2	0	2
0	43	3	1	1	94	1	1	1	0	0	1	0.1	1	1	0	0	0	1	3.7	1	5	0	2
0	59	4	1	1	93	2	2	2	2	2	2	0.16	2	2	2	2	2	1	7	3	4	1	4
1	73	6	1	1	92	1	1	1	2	2	2	0.3	2	1	2	2	2	1	7	3	6	1	4
1	62	5	1	1	8	1	1	1	0	0	1	0.08	1	1	0	0	1	2	5.7	1	6	1	4
1	67	5	1	1	8	1	1	1	0	0	0	0.01	1	1	0	0	1	1	6.8	1	5	0	2
0	59	4	1	1	8	1	1	1	0	0	0	0.01	1	1	0	0	1	1	3	1	2	0	2
0	62	5	1	1	8	2	2	2	2	2	2	0.16	2	2	2	2	2	1	7	2	4	1	4
1	60	5	1	2	98	1	1	1	0	2	0	0.05	2	2	2	2	0	3	1	1	1	0	1
0	66	5	1	1	8	1	1	1	0	0	1	0.15	1	1	1	1	1	1	3	1	7	0	3
0	35	2	1	3	100	1	1	1	0	0	0	0.08	1	1	0	0	1	1	19.5	1	2	1	4
1	52	4	1	1	91	1	1	1	0	2	0	0.2	1	0	0	2	2	1	3.5	1	8	0	3
1	70	6	1	1	90	1	1	1	0	0	1	0.3	1	1	1	2	2	2	6.5	1	6	1	4
1	42	3	1	1	4	1	1	1	0	0	0	0.04	1	1	0	0	1	2	2.8	1	3	0	2
1	80	7	1	1	4	1	1	1	0	0	0	0.2	1	1	0	0	1	2	8	1	9	1	4
1	65	5	1	1	4	1	1	1	0	0	0	0.05	2	2	0	2	1	2	3.5	1	7	1	4
0	65	5	1	1	4	1	1	1	0	2	1	0.03	2	1	2	2	2	2	3.8	2	7	1	4
1	48	3	0	0	0	1	1	1	0	0	1	0.2	0	1	0	0	1	2	4	2	4	0	2
1	66	5	1	1	4	1	1	1	0	0	1	0.04	2	1	1	2	2	1	0.5	1	1	0	1
1	62	5	1	5	1	1	1	1	0	2	1	0.1	1	1	2	2	2	1	4.5	2	6	0	3
0	65	5	1	1	1	1	1	1	0	0	0	0.1	2	2	0	2	2	1	2	1	8	0	2
0	65	5	1	1	1	1	1	1	0	0	0	0.1	2	2	0	2	2	1	2	1	8	0	2
0	71	6	1	1	4	1	1	1	0	0	0	0.1	1	1	0	0	1	1	3.5	1	6	0	2
1	45	3	1	1	4	1	1	1	0	0	0	0.1	0	1	0	1	0	3	2	2	4	0	2
1	41	3	1	1	4	1	0	0	0	2	1	0.6	2	1	0	2	2	1	11.5	2	4	1	4
0	53	4	1	1	4	1	1	1	0	0	0	0.05	0	0	0	1	1	1	0.3	1	4	0	2
0	61	5	1	1	4	1	1	1	0	0	0	0.1	1	1	0	1	1	1	4	1	28.4	1	4
0	49	3	0	0	0	2	2	2	2	2	2	0.16	0	2	2	2	2	1	15	2	4	1	4
0	58	4	1	1	4	1	1	1	0	0	0	0.1	1	1	0	2	1	1	11	1	6	1	4
1	62	5	1	1	4	1	1	1	0	0	0	0.2	1	1	0	0	1	2	7	1	6	1	4
1	74	6	1	1	4	1	1	1	0	0	1	0.2	1	1	0	0	1	1	3.8	1	7	0	3
0	34	2	1	1	20	1	1	1	0	2	0	0.2	1	1	0	2	2	3	7	2	2.5	1	4
1	67	5	1	1	20	1	1	1	0	0	0	0.3	1	1	0	2	2	1	7	1	14	1	4
0	77	6	1	1	89	2	2	2	2	2	2	0.16	2	2	2	2	2	1	6	2	6	0	3
1	53	4	1	1	88	1	1	1	0	0	0	0.4	1	1	0	0	1	1	14	2	4	1	4
0	62	5	1	1	87	1	1	1	0	2	0	0.1	1	1	0	2	1	1	2	1	5	0	2
0	59	4	1	5	102	2	2	2	2	2	2	0.16	2	2	2	2	2	1	14.3	2	4	1	4
1	74	6	1	1	86	1	1	1	0	0	1	0.2	1	1	0	2	1	1	3.5	1	3	0	2
0	55	4	1	1	85	1	1	1	0	0	0	0.2	1	2	0	0	2	1	3.6	2	4	0	2
0	55	4	1	1	84	1	1	1	0	0	0	0.1	0	1	0	0	2	1	17	1	9	1	4
1	67	5	1	2	98	1	1	1	0	2	1	0.4	2	1	1	2	2	3	11	3	6	1	4
0	59	4	1	1	83	1	1	1	0	2	0	0.15	2	2	0	2	1	1	3.5	1	6	0	3
1	75	6	1	1	1	1	1	1	0	2	0	0.2	0	1	2	2	2	1	13	2	6	1	4
1	75	6	1	1	1	1	1	1	0	2	0	0.2	0	1	2	2	2	1	13	2	6	1	4
0	61	5	1	1	82	1	1	1	0	2	0	0.03	2	2	2	2	2	1	0.6	1	2	0	1
0	62	5	1	1	81	1	1	1	0	0	0	0.08	1	1	1	0	1	1	4	1	11	1	4
1	69	5	1	5	102	1	1	1	0	0	1	0.08	1	1	0	0	1	1	3	2	4	0	2
1	41	3	1	1	80	1	1	1	0	0	1	0.2	1	1	0	0	1	2	10	2	25	1	4
0	69	5	1	2	98	2	2	2	2	2	2	0.16	2	2	2	2	2	2	7	2	4	1	4
0	32	2	0	0	0	2	2	2	2	2	2	0.16	0	2	2	2	2	1	11	2	6	1	4
0	75	6	1	1	79	1	1	1	0	0	0	0.65	2	1	0	2	2	2	8	3	6	1	4
1	68	5	1	1	78	1	1	1	0	0	1	0.05	2	1	0	2	2	2	2.5	1	4	0	3
1	32	2	1	1	77	1	1	0	0	0	1	0.2	1	1	0	0	1	2	4.5	1	5	0	3
0	79	6	1	2	98	2	2	2	2	2	2	0.16	2	2	2	2	2	2	6	2	6	0	3
0	47	3	1	1	76	2	2	2	2	2	2	0.16	2	2	2	2	2	3	7	2	4	1	4
1	66	5	1	1	75	1	1	0	0	0	1	0.4	1	2	0	2	2	1	17.8	2	6	1	4
0	62	5	1	2	98	1	1	1	2	2	1	0.2	1	1	1	2	2	3	1.8	2	4	0	1
1	61	5	1	1	74	1	1	1	1	0	1	0.1	0	1	0	0	1	4	4.5	2	7	0	3
0	58	4	1	1	19	1	1	0	0	0	0	0.1	1	1	0	0	1	2	11	1	4	1	4
1	50	4	1	1	19	1	1	1	0	0	0	0.1	2	1	2	1	1	1	6	1	16.6	1	4
0	61	5	1	1	5	2	2	2	2	2	2	0.16	2	2	2	2	2	1	4	2	4	0	2
1	56	4	1	1	5	1	1	0	0	0	1	0.01	1	1	0	0	1	2	12	1	4	1	4
1	45	3	0	0	0	1	1	1	0	0	0	0.01	0	1	1	0	0	5	0.5	2	4	0	1
0	73	6	1	1	5	1	1	1	0	0	0	0.15	1	2	0	2	2	1	4	1	8	0	3
1	61	5	1	1	5	2	2	2	2	2	2	0.16	2	2	2	2	2	1	2.5	2	4	0	2
1	55	4	0	0	0	1	1	1	0	2	1	0.03	0	2	1	2	2	1	1.6	1	4	0	1
0	52	4	1	5	103	1	1	1	0	0	0	0.2	0	1	0	0	1	1	9	2	5	0	3
1	63	5	1	1	5	1	1	0	0	0	1	0.07	2	1	0	0	1	3	11	2	4	1	4
0	54	4	1	1	5	1	1	1	0	0	0	0.1	2	1	0	0	1	1	10	1	8	1	4
1	74	6	1	1	5	1	1	1	0	0	0	0.05	1	1	0	0	1	1	1.2	1	6	0	2
0	68	5	1	1	1	1	1	0	0	2	0	0.15	1	1	1	2	2	1	2	2	4	0	2
0	68	5	1	1	1	1	1	0	0	2	0	0.15	1	1	1	2	2	1	2	2	4	0	2
0	71	6	1	1	5	1	1	1	0	0	1	0.2	2	1	0	0	2	5	9	2	30	1	4
1	60	5	1	1	5	2	2	2	2	2	2	0.16	2	2	2	2	2	1	7	2	12	1	4
1	73	6	1	1	73	1	1	0	0	0	0	0.1	1	1	0	2	2	1	10.9	1	9	1	4
0	71	6	1	2	99	1	1	0	0	2	1	0.03	1	2	1	0	2	2	6	2	6	0	3
1	65	5	1	5	105	1	1	1	0	0	1	0.1	1	1	0	1	1	1	16	1	12	1	4
0	62	5	1	1	72	1	1	1	0	0	1	0.05	0	1	0	0	1	2	4	1	1	0	2
1	66	5	1	1	1	1	1	1	0	0	0	0.3	1	1	1	2	2	3	12	1	38	1	4
1	66	5	1	1	1	1	1	1	0	0	0	0.3	1	1	1	2	2	3	12	1	38	1	4
0	73	6	1	1	71	2	2	2	2	2	2	0.16	2	2	2	2	2	1	2	2	6	0	2
1	78	6	1	1	70	2	2	2	2	2	2	0.16	2	2	2	2	2	2	6	2	6	0	3
0	58	4	1	1	5	1	1	1	0	0	0	0.1	1	0	0	2	2	1	18.5	1	9	1	4
1	54	4	1	1	11	1	1	1	0	0	0	0.1	1	1	0	2	2	1	3.6	1	5	0	2
0	61	5	1	1	11	1	1	1	0	0	0	0.1	1	1	0	0	1	1	2.8	1	3	0	2
1	47	3	1	1	11	1	1	1	0	0	0	0.15	1	1	0	0	1	1	8	1	3	0	3
0	72	6	1	1	7	1	1	1	0	0	0	0.1	1	1	0	2	2	1	2.8	1	6	0	2
1	52	4	1	1	7	2	2	2	2	2	2	0.16	2	2	2	2	2	1	7	2	4	1	4
0	77	6	0	0	0	1	1	0	0	0	1	0.2	1	1	0	0	1	2	4.5	1	6	0	2
0	46	3	1	1	7	1	1	1	0	0	0	0.1	1	2	0	2	2	1	4	1	7	0	2
0	47	3	1	1	7	1	1	1	0	0	1	0.1	1	1	0	1	1	1	0.8	1	4	0	2
1	63	5	1	2	98	1	0	1	0	0	1	0.3	1	1	0	2	2	2	11	2	4	1	4
0	53	4	1	1	7	1	1	0	0	0	0	0.4	2	1	0	2	2	1	3	3	80.6	1	4
1	56	4	1	1	10	1	1	0	0	0	0	0.2	0	1	0	0	1	2	7.8	1	14	1	4
1	78	6	1	1	10	1	1	0	0	2	0	0.08	2	2	0	2	2	2	13	1	9	1	4
1	74	6	1	1	10	1	1	1	0	0	0	0.1	1	1	0	0	1	1	7.5	1	9.5	1	4
0	75	6	1	1	10	1	1	1	0	0	0	0.08	1	1	0	0	1	1	3.8	1	14.2	1	4
0	59	4	1	1	3	1	1	1	0	0	1	0.04	1	2	0	2	2	2	4.5	1	6	0	3
0	52	4	1	1	1	1	1	0	0	0	1	0.2	1	1	1	0	1	1	7	2	4	1	4
0	52	4	1	4	1	1	1	0	0	0	1	0.2	1	1	1	0	1	1	7	2	4	1	4
1	36	2	0	0	0	2	2	2	2	2	2	0.16	0	2	2	2	2	1	7	2	2.5	1	4
1	68	5	1	2	98	1	1	1	1	1	1	0.05	1	1	1	2	2	1	1.1	2	4	0	1
1	58	4	1	4	1	2	2	2	2	2	2	0.16	2	2	2	2	2	2	7	2	4	1	4
1	58	4	1	4	1	2	2	2	2	2	2	0.16	2	2	2	2	2	2	7	2	4	1	4
0	50	4	1	1	3	1	1	1	0	0	0	0.3	1	1	0	0	1	3	2	2	4	0	1
0	60	5	1	1	3	1	1	1	0	0	0	0.3	1	1	0	0	1	1	17	1	18	1	4
1	58	4	1	2	98	1	1	1	0	0	0	0.05	2	1	1	2	2	2	2	1	4	0	2
0	50	4	1	3	100	1	1	1	0	0	0	0.1	0	2	0	2	2	1	1.5	1	3	0	1
1	56	4	1	1	3	2	2	2	2	2	2	0.16	2	2	2	2	2	1	7	1	4	1	4
0	71	6	1	1	3	1	1	1	0	0	0	0.01	1	1	0	0	0	1	3.3	1	3	0	2
1	55	4	0	0	0	2	2	2	2	2	2	0.16	0	2	2	2	2	2	7	1	4	1	4
1	70	6	1	1	3	1	1	1	0	0	1	0.08	1	1	0	2	1	1	2.5	1	6	0	2
1	58	4	1	1	3	0	1	0	0	0	1	0.15	0	1	0	0	1	2	2	1	4	0	2
1	64	5	1	3	100	2	2	2	2	2	2	0.16	2	2	2	2	2	1	7	1	4	1	4
1	64	5	1	1	3	1	1	1	0	0	0	0.1	2	1	0	1	1	1	4.5	1	4	0	2
1	79	6	1	1	3	1	1	1	0	0	0	0.1	1	1	0	1	1	1	2.5	1	6	0	2
1	64	5	1	1	3	1	1	1	0	0	0	0.08	1	1	0	0	1	1	4.8	1	6	0	2
1	50	4	1	1	3	1	1	1	0	0	0	0.2	1	1	0	0	1	1	7	1	7	1	4
0	83	7	1	1	3	1	1	1	0	0	0	0.15	1	2	0	0	1	1	6	1	6	0	3
1	62	5	1	1	3	2	2	2	2	2	2	0.16	2	2	2	2	2	1	7	1	4	1	4
0	54	4	1	1	3	1	1	1	0	0	0	0.1	1	1	0	1	1	1	4.5	1	4	0	2
0	68	5	1	1	69	1	1	0	0	2	1	0.05	2	0	2	2	2	3	11.5	1	4	1	4
0	64	5	1	1	68	1	1	1	0	2	0	0.15	2	1	1	2	2	2	2	1	4	0	2
0	57	4	1	1	18	2	2	2	2	2	2	0.16	2	2	2	2	2	2	7	1	4	1	4
0	61	5	1	1	18	1	1	1	0	2	1	0.02	1	2	0	2	2	1	4.8	1	7	0	2
1	51	4	1	2	98	2	2	2	2	2	2	0.16	2	2	2	2	2	4	2	1	4	0	1
1	59	4	1	1	67	1	1	1	0	0	0	0.05	1	1	0	1	1	1	2.4	1	6	0	2
0	67	5	1	1	66	1	1	1	0	0	0	0.1	2	2	0	2	2	1	4	1	4	0	2
0	66	5	1	1	65	1	1	1	0	0	0	0.05	1	1	0	1	1	1	13	1	4	1	4
1	53	4	1	1	64	1	1	1	0	0	0	0.1	1	1	0	0	1	3	3	1	11	1	4
1	37	2	1	3	101	1	1	1	0	0	1	0.1	1	1	0	0	1	1	2.5	1	7.1	0	3
0	66	5	1	1	63	1	1	1	0	0	1	0.1	1	1	1	0	2	1	12	2	3	1	4
1	52	4	1	1	1	2	2	2	2	2	2	0.16	2	2	2	2	2	2	7	1	4	1	4
1	52	4	1	3	1	2	2	2	2	2	2	0.16	2	2	2	2	2	2	7	1	4	1	4
0	52	4	1	1	61	1	1	1	0	0	1	0.05	2	2	0	0	2	2	13.4	1	2	1	4
1	60	5	1	5	104	2	2	2	2	2	2	0.16	2	2	2	2	2	1	7	1	4	1	4
0	46	3	1	1	62	1	1	1	2	2	0	0.03	2	2	0	2	1	1	1.5	1	3	0	1
1	58	4	1	1	9	1	1	1	0	2	1	0.1	2	2	0	2	2	1	4.8	1	7	0	3
1	51	4	1	1	9	1	1	1	0	0	0	0.05	1	1	0	0	1	1	10.5	1	3	1	4
1	53	4	1	1	9	2	2	2	2	2	2	0.16	2	2	2	2	2	1	7	1	4	1	4
0	58	4	1	1	9	1	1	1	0	0	0	0.05	1	1	0	2	2	3	4	1	4	0	2
0	71	6	1	1	17	1	1	1	0	0	0	0.05	2	2	0	0	2	1	6.5	1	6	0	3
0	42	3	0	0	0	1	1	1	0	0	1	0.05	0	1	0	2	2	1	0.7	1	4	0	2
1	57	4	1	1	17	2	2	2	2	2	2	0.16	2	2	2	2	2	1	7	1	4	1	4
1	34	2	0	0	0	2	2	2	2	2	2	0.16	0	2	2	2	2	3	4	1	2.5	0	2
0	76	6	1	1	60	1	1	1	0	0	1	0.05	0	1	0	0	0	1	6	1	6	0	3
1	62	5	1	1	1	1	1	0	0	2	1	0.2	2	2	0	0	2	1	7	1	4	1	4
1	62	5	1	3	1	1	1	0	0	2	1	0.2	2	2	0	0	2	1	7	1	4	1	4
0	65	5	1	1	59	1	1	1	0	0	1	0.1	2	1	0	0	1	2	12	1	4	1	4
0	69	5	1	1	58	2	2	2	2	2	2	0.16	2	2	2	2	2	1	7	1	4	1	4
1	54	4	1	1	6	2	2	2	2	2	2	0.16	2	2	2	2	2	1	6.5	1	15	1	4
1	57	4	1	1	6	1	1	1	2	2	1	0.6	2	1	0	2	2	1	6.7	1	6	1	4
1	61	5	1	1	1	1	1	1	0	0	1	0.1	0	1	0	0	2	2	5.5	1	7	1	4
1	61	5	1	3	1	1	1	1	0	0	1	0.1	0	1	0	0	2	2	5.5	1	7	1	4
1	59	4	1	1	6	1	1	1	0	0	0	0.2	1	1	0	0	1	3	1	1	4	0	1
1	53	4	0	0	0	1	1	1	0	0	1	0.1	0	1	1	1	1	1	8	2	3	0	3
1	60	5	1	1	6	1	1	1	2	2	2	0.3	1	1	2	2	2	1	16	1	4	1	4
1	74	6	1	1	6	1	1	1	0	0	0	0.06	1	1	0	1	1	2	6.5	3	7.1	1	4
1	39	2	0	0	0	1	1	1	0	0	1	0.05	0	1	1	0	2	5	1	1	2.5	0	1
0	39	2	1	1	57	1	1	1	0	2	0	0.03	1	2	0	2	2	1	2	1	3	0	1
1	43	3	1	5	102	1	1	1	0	0	0	0.1	1	1	0	1	1	1	8	3	9.5	1	4
1	58	4	1	1	56	1	1	1	0	2	0	0.5	1	1	0	1	1	1	22	1	4	1	4
0	21	1	0	0	0	2	2	2	2	2	2	0.16	0	2	2	2	2	1	4	1	3	0	2
0	57	4	1	1	55	1	1	1	0	0	0	0.02	1	1	0	0	1	1	4	1	4	0	2
0	71	6	1	1	16	1	1	1	0	0	0	0.2	1	1	1	2	1	1	4	1	6	0	3
0	58	4	1	1	16	1	1	1	0	0	0	0.5	2	1	0	2	1	2	11	1	4	1	4
1	75	6	1	1	15	1	1	1	0	0	0	0.2	1	1	0	0	1	1	7	1	16	1	4
0	50	4	1	1	15	1	1	1	0	0	1	0.1	0	1	0	0	1	4	6.8	1	5	1	4
0	61	5	1	2	98	1	1	0	0	0	0	0.04	1	1	0	0	1	2	10.8	1	5	1	4
0	50	4	1	1	54	1	1	1	0	0	0	0.03	1	1	0	2	1	1	5	1	4.7	0	3
0	71	6	0	0	0	1	1	1	0	0	0	0.05	0	1	0	0	1	2	5.5	2	4.7	0	3
0	60	5	0	0	0	1	1	1	0	0	0	0.03	0	1	0	0	0	1	2	1	12	1	4
0	69	5	1	1	14	1	1	1	0	0	1	0.1	2	1	2	2	2	2	2.2	1	6	0	3
1	58	4	1	1	14	2	2	2	2	2	2	0.16	2	2	2	2	2	3	7	1	6	1	4
0	69	5	1	1	53	2	2	2	2	2	2	0.16	2	2	2	2	2	3	7	1	4	1	4
1	88	7	0	0	0	1	0	0	0	0	1	0.1	1	1	1	0	0	2	6.5	1	8	1	4
1	42	3	1	1	2	2	2	2	2	2	2	0.16	2	2	2	2	2	2	4	1	4	0	2
1	57	4	1	1	2	1	1	1	0	0	0	0.3	2	1	0	2	2	1	0.6	1	4	0	1
1	55	4	1	1	2	1	1	1	1	0	0	0.3	1	1	0	0	1	1	8	1	40	1	4
0	59	4	1	1	2	1	1	1	0	0	0	0.05	1	2	2	2	2	1	2.5	1	4	0	2
0	52	4	1	1	2	1	1	1	0	2	1	0.3	2	1	0	2	2	1	15	1	5	1	4
1	75	6	1	1	2	1	1	1	0	2	1	0.02	2	2	2	2	2	4	10.5	1	6	1	4
0	58	4	1	5	103	1	1	0	0	0	0	0.1	1	1	0	1	1	1	2.5	3	15	0	3
1	51	4	1	1	2	1	1	1	0	0	0	0.03	1	0	0	0	1	3	4.6	1	6	0	3
1	59	4	1	1	2	1	1	1	0	2	1	0.1	2	2	0	2	2	3	8	1	10	1	4
0	60	5	1	1	2	1	1	1	0	0	1	0.4	2	1	0	2	2	3	7	1	4	1	4
1	49	3	0	0	0	1	1	0	0	2	0	0.05	0	1	0	2	2	2	0.2	1	2	0	1
1	51	4	1	2	98	1	1	1	0	0	1	0.05	1	1	0	1	1	2	1.5	1	2	0	1
0	59	4	1	1	2	1	1	1	0	0	0	0.2	1	1	0	0	0	1	22	1	4	1	4
0	66	5	1	1	2	2	2	2	2	2	2	0.16	2	2	2	2	2	1	4	1	4	0	2
1	64	5	1	1	2	2	2	2	2	2	2	0.16	2	2	2	2	2	1	4	1	4	0	2
1	50	4	1	1	2	1	1	1	0	0	0	0.02	1	1	0	1	1	1	3.1	2	4	0	2
0	59	4	1	1	2	0	1	0	0	0	0	0.2	1	1	0	2	0	1	7	1	14	1	4
1	30	2	1	1	2	1	1	1	0	0	0	0.05	1	1	0	1	1	1	3	1	3	0	2
0	54	4	1	1	1	1	1	1	0	1	0	0.1	1	1	1	0	1	1	4	1	4	0	2
0	54	4	1	4	1	1	1	1	0	1	0	0.1	1	1	1	0	1	1	4	1	4	0	2
0	55	4	1	1	52	1	1	1	0	0	1	0.1	2	2	1	2	2	1	2.6	1	8	0	3
1	63	5	1	2	98	1	1	1	0	0	1	0.3	1	1	0	2	1	2	9	2	10	1	4
1	82	7	1	1	51	1	1	1	0	0	1	0.1	2	1	0	0	1	2	3.5	1	6	0	2
1	61	5	1	1	50	1	1	1	0	0	0	0.08	1	1	0	2	2	3	4	1	4	0	2
1	51	4	1	1	49	1	1	1	0	0	1	0.7	1	1	1	0	1	1	11	1	7	1	4
0	37	2	1	1	48	1	1	1	0	0	0	0.15	2	2	0	2	2	3	6	1	7	1	4
0	66	5	0	0	0	1	1	1	0	0	1	0.15	0	1	0	0	2	1	0.3	1	4	0	1
1	51	4	1	1	47	1	1	1	0	0	1	0.1	1	1	0	0	1	1	0.5	2	4	0	1
1	77	6	1	1	46	1	1	1	0	0	0	0.3	1	1	0	0	1	1	15.3	2	7	1	4
1	82	7	1	1	45	1	1	1	0	0	0	0.35	1	0	0	0	0	3	4	3	35	1	4
0	76	6	1	1	44	1	1	1	0	0	1	0.04	1	1	1	1	1	2	7	1	6	1	4
1	61	5	1	2	98	1	1	1	0	0	0	0.2	1	1	1	1	0	3	0.5	1	4	0	1
1	60	5	1	2	98	1	1	1	0	0	1	0.1	1	1	0	0	1	2	5	1	6	0	3
1	64	5	1	5	102	1	1	1	0	0	1	0.2	1	1	0	0	1	1	2.5	1	7	0	3
0	53	4	0	0	0	1	1	1	0	0	0	0.1	0	1	0	0	1	1	0.5	1	4	0	1
1	59	4	1	1	43	1	1	1	2	2	0	0.5	1	1	2	2	2	1	16.2	1	6	1	4
1	52	4	1	1	42	2	2	2	2	2	2	0.16	2	2	2	2	2	2	0.5	1	4	0	1
1	55	4	1	1	41	1	1	1	0	2	0	0.08	2	1	0	2	2	1	3.5	1	4	0	2
1	52	4	1	5	102	1	1	1	0	0	1	0.1	1	2	0	2	2	1	5	1	4	0	2
1	43	3	1	1	40	1	1	1	0	0	0	0.4	0	1	0	0	0	1	15	1	112	1	4
1	57	4	0	0	0	1	1	1	0	0	0	0.03	0	2	0	2	2	1	10	2	14.2	1	4
0	76	6	1	1	39	1	1	1	0	0	0	0.03	1	1	0	0	2	1	1.5	1	6	0	2
1	69	5	1	1	13	1	1	0	0	0	0	0.2	1	1	0	0	1	2	8	1	4	0	3
0	51	4	1	1	13	1	1	0	0	0	1	0.04	1	1	1	2	1	3	2.5	1	4	0	2
1	47	3	1	1	36	2	2	2	2	2	2	0.16	2	2	2	2	2	1	2.5	1	4	0	2
0	65	5	1	1	38	2	2	2	2	2	2	0.16	2	2	2	2	2	1	2.5	1	4	0	2
1	68	5	1	1	37	1	1	1	0	2	0	0.13	2	1	0	2	2	1	17.3	1	10	1	4
1	61	5	1	1	34	1	1	1	0	0	0	0.05	1	1	0	0	1	1	4.2	1	4	0	2
0	70	6	1	1	35	1	1	1	0	0	0	0.05	0	1	0	1	1	1	2	1	9	0	3
0	57	4	1	1	33	2	2	2	2	2	2	0.16	2	2	2	2	2	2	2.5	1	4	0	2
0	50	4	1	1	32	1	1	1	0	0	0	0.2	0	1	0	0	1	1	5.6	1	3	0	3
0	51	4	1	1	1	1	1	1	0	0	0	0.4	1	1	1	1	1	4	7	1	4	1	4
0	51	4	1	4	1	1	1	1	0	0	0	0.4	1	1	1	1	1	4	7	1	4	1	4
1	65	5	1	1	31	1	1	1	0	0	1	0.4	1	1	0	0	1	2	14	1	6	1	4
1	71	6	1	1	30	2	2	2	2	2	2	0.16	2	2	2	2	2	1	16.7	1	6	1	4
1	57	4	1	1	12	1	1	0	0	0	1	0.05	1	1	0	0	1	2	7	1	9.5	1	4
1	80	7	1	1	12	1	1	1	0	0	0	0.3	0	1	0	2	1	1	17	1	6	1	4
0	65	5	1	1	29	1	1	1	0	0	0	0.2	1	1	0	0	1	1	9	1	14	1	4
0	55	4	1	1	28	1	1	1	0	0	0	0.01	1	1	0	0	1	1	10.8	1	4	1	4
1	57	4	1	1	1	1	1	1	0	0	0	0.6	1	1	0	0	1	1	12.5	1	6	1	4
1	61	5	1	5	106	1	1	1	1	0	1	0.2	1	1	1	1	1	1	3	1	2	0	2
1	54	4	1	1	27	1	1	1	0	0	0	0.07	1	1	0	0	1	1	3.5	1	4	0	2
0	67	5	1	1	26	1	1	1	0	0	0	0.25	1	1	0	0	1	1	5	1	17	1	4
1	83	7	1	1	25	1	1	1	0	0	1	0.4	1	1	0	0	1	3	7.5	1	6	1	4
1	78	6	1	1	24	1	1	1	0	0	0	0.04	1	2	0	2	2	1	13.3	1	6	1	4
1	84	7	1	1	23	1	1	1	0	0	1	0.03	1	1	1	2	2	1	0.4	1	1	0	1
1	73	6	1	1	22	2	2	2	2	2	2	0.16	2	2	2	2	2	1	1.4	1	6	0	2
0	63	5	0	0	0	1	1	1	0	0	0	0.05	0	1	0	0	1	1	13	1	4	1	4
1	57	4	0	0	0	1	1	1	0	0	0	0.02	0	1	0	0	1	1	2.5	1	4	0	2
1	57	4	1	3	1	1	1	1	0	0	0	0.6	1	1	0	0	1	1	12.5	1	6	1	4

## Sheet: 突变VS野生组
组别	SEX	AGE	AGE2	Y1	Y2	Y3	CD117	Dog-1	CD34	S100	S10	SMA	Ki67	SDH	V	D	S6	B2	X1	X2	X3	X4	X5	X6
1	1	60	5	1	1	97	2	2	2	2	2	2	0.4	2	2	2	2	2	1	12	3	6	1	4
1	1	62	5	1	2	1	1	1	1	0	2	1	0.1	1	1	2	2	2	1	4.5	2	6	0	3
1	1	70	6	1	1	96	1	1	1	0	0	0	0.15	1	1	1	0	1	1	2.2	1	6	0	2
1	1	59	4	1	1	21	2	2	2	2	2	2	0.16	2	2	2	2	2	3	0.5	3	4	0	1
1	1	52	4	1	2	98	1	1	0	0	2	0	0.2	1	2	0	2	2	2	6	3	22	1	4
1	1	61	5	1	1	21	1	1	1	0	0	1	0.1	1	0	0	0	1	1	3	1	6	0	2
1	1	66	5	1	5	102	1	1	1	0	2	1	0.1	2	1	0	2	2	1	5	2	22	1	4
1	1	67	5	1	1	95	1	1	1	0	0	1	0.2	1	1	1	1	1	1	3.8	1	2	0	2
1	0	43	3	1	1	94	1	1	1	0	0	1	0.1	1	1	0	0	0	1	3.7	1	5	0	2
1	0	59	4	1	1	93	2	2	2	2	2	2	0.16	2	2	2	2	2	1	7	3	4	1	4
1	1	73	6	1	1	92	1	1	1	2	2	2	0.3	2	1	2	2	2	1	7	3	6	1	4
1	1	62	5	1	1	8	1	1	1	0	0	1	0.08	1	1	0	0	1	2	5.7	1	6	1	4
1	1	67	5	1	1	8	1	1	1	0	0	0	0.01	1	1	0	0	1	1	6.8	1	5	0	2
1	0	59	4	1	1	8	1	1	1	0	0	0	0.01	1	1	0	0	1	1	3	1	2	0	2
1	0	62	5	1	1	8	2	2	2	2	2	2	0.16	2	2	2	2	2	1	7	2	4	1	4
1	1	60	5	1	2	98	1	1	1	0	2	0	0.05	2	2	2	2	0	3	1	1	1	0	1
1	0	66	5	1	1	8	1	1	1	0	0	1	0.15	1	1	1	1	1	1	3	1	7	0	3
1	0	35	2	1	3	100	1	1	1	0	0	0	0.08	1	1	0	0	1	1	19.5	1	2	1	4
1	1	52	4	1	1	91	1	1	1	0	2	0	0.2	1	0	0	2	2	1	3.5	1	8	0	3
1	1	70	6	1	1	90	1	1	1	0	0	1	0.3	1	1	1	2	2	2	6.5	1	6	1	4
1	1	42	3	1	1	4	1	1	1	0	0	0	0.04	1	1	0	0	1	2	2.8	1	3	0	2
1	1	80	7	1	1	4	1	1	1	0	0	0	0.2	1	1	0	0	1	2	8	1	9	1	4
1	1	65	5	1	1	4	1	1	1	0	0	0	0.05	2	2	0	2	1	2	3.5	1	7	1	4
1	0	65	5	1	1	4	1	1	1	0	2	1	0.03	2	1	2	2	2	2	3.8	2	7	1	4
1	1	66	5	1	1	4	1	1	1	0	0	1	0.04	2	1	1	2	2	1	0.5	1	1	0	1
1	1	62	5	1	5	1	1	1	1	0	2	1	0.1	1	1	2	2	2	1	4.5	2	6	0	3
1	0	65	5	1	1	1	1	1	1	0	0	0	0.1	2	2	0	2	2	1	2	1	8	0	2
1	0	65	5	1	1	1	1	1	1	0	0	0	0.1	2	2	0	2	2	1	2	1	8	0	2
1	0	71	6	1	1	4	1	1	1	0	0	0	0.1	1	1	0	0	1	1	3.5	1	6	0	2
1	1	45	3	1	1	4	1	1	1	0	0	0	0.1	0	1	0	1	0	3	2	2	4	0	2
1	1	41	3	1	1	4	1	0	0	0	2	1	0.6	2	1	0	2	2	1	11.5	2	4	1	4
1	0	53	4	1	1	4	1	1	1	0	0	0	0.05	0	0	0	1	1	1	0.3	1	4	0	2
1	0	61	5	1	1	4	1	1	1	0	0	0	0.1	1	1	0	1	1	1	4	1	28.4	1	4
1	0	58	4	1	1	4	1	1	1	0	0	0	0.1	1	1	0	2	1	1	11	1	6	1	4
1	1	62	5	1	1	4	1	1	1	0	0	0	0.2	1	1	0	0	1	2	7	1	6	1	4
1	1	74	6	1	1	4	1	1	1	0	0	1	0.2	1	1	0	0	1	1	3.8	1	7	0	3
1	0	34	2	1	1	20	1	1	1	0	2	0	0.2	1	1	0	2	2	3	7	2	2.5	1	4
1	1	67	5	1	1	20	1	1	1	0	0	0	0.3	1	1	0	2	2	1	7	1	14	1	4
1	0	77	6	1	1	89	2	2	2	2	2	2	0.16	2	2	2	2	2	1	6	2	6	0	3
1	1	53	4	1	1	88	1	1	1	0	0	0	0.4	1	1	0	0	1	1	14	2	4	1	4
1	0	62	5	1	1	87	1	1	1	0	2	0	0.1	1	1	0	2	1	1	2	1	5	0	2
1	0	59	4	1	5	102	2	2	2	2	2	2	0.16	2	2	2	2	2	1	14.3	2	4	1	4
1	1	74	6	1	1	86	1	1	1	0	0	1	0.2	1	1	0	2	1	1	3.5	1	3	0	2
1	0	55	4	1	1	85	1	1	1	0	0	0	0.2	1	2	0	0	2	1	3.6	2	4	0	2
1	0	55	4	1	1	84	1	1	1	0	0	0	0.1	0	1	0	0	2	1	17	1	9	1	4
1	1	67	5	1	2	98	1	1	1	0	2	1	0.4	2	1	1	2	2	3	11	3	6	1	4
1	0	59	4	1	1	83	1	1	1	0	2	0	0.15	2	2	0	2	1	1	3.5	1	6	0	3
1	1	75	6	1	1	1	1	1	1	0	2	0	0.2	0	1	2	2	2	1	13	2	6	1	4
1	1	75	6	1	1	1	1	1	1	0	2	0	0.2	0	1	2	2	2	1	13	2	6	1	4
1	0	61	5	1	1	82	1	1	1	0	2	0	0.03	2	2	2	2	2	1	0.6	1	2	0	1
1	0	62	5	1	1	81	1	1	1	0	0	0	0.08	1	1	1	0	1	1	4	1	11	1	4
1	1	69	5	1	5	102	1	1	1	0	0	1	0.08	1	1	0	0	1	1	3	2	4	0	2
1	1	41	3	1	1	80	1	1	1	0	0	1	0.2	1	1	0	0	1	2	10	2	25	1	4
1	0	69	5	1	2	98	2	2	2	2	2	2	0.16	2	2	2	2	2	2	7	2	4	1	4
1	0	75	6	1	1	79	1	1	1	0	0	0	0.65	2	1	0	2	2	2	8	3	6	1	4
1	1	68	5	1	1	78	1	1	1	0	0	1	0.05	2	1	0	2	2	2	2.5	1	4	0	3
1	1	32	2	1	1	77	1	1	0	0	0	1	0.2	1	1	0	0	1	2	4.5	1	5	0	3
1	0	79	6	1	2	98	2	2	2	2	2	2	0.16	2	2	2	2	2	2	6	2	6	0	3
1	0	47	3	1	1	76	2	2	2	2	2	2	0.16	2	2	2	2	2	3	7	2	4	1	4
1	1	66	5	1	1	75	1	1	0	0	0	1	0.4	1	2	0	2	2	1	17.8	2	6	1	4
1	0	62	5	1	2	98	1	1	1	2	2	1	0.2	1	1	1	2	2	3	1.8	2	4	0	1
1	1	61	5	1	1	74	1	1	1	1	0	1	0.1	0	1	0	0	1	4	4.5	2	7	0	3
1	0	58	4	1	1	19	1	1	0	0	0	0	0.1	1	1	0	0	1	2	11	1	4	1	4
1	1	50	4	1	1	19	1	1	1	0	0	0	0.1	2	1	2	1	1	1	6	1	16.6	1	4
1	0	61	5	1	1	5	2	2	2	2	2	2	0.16	2	2	2	2	2	1	4	2	4	0	2
1	1	56	4	1	1	5	1	1	0	0	0	1	0.01	1	1	0	0	1	2	12	1	4	1	4
1	0	73	6	1	1	5	1	1	1	0	0	0	0.15	1	2	0	2	2	1	4	1	8	0	3
1	1	61	5	1	1	5	2	2	2	2	2	2	0.16	2	2	2	2	2	1	2.5	2	4	0	2
1	0	52	4	1	5	103	1	1	1	0	0	0	0.2	0	1	0	0	1	1	9	2	5	0	3
1	1	63	5	1	1	5	1	1	0	0	0	1	0.07	2	1	0	0	1	3	11	2	4	1	4
1	0	54	4	1	1	5	1	1	1	0	0	0	0.1	2	1	0	0	1	1	10	1	8	1	4
1	1	74	6	1	1	5	1	1	1	0	0	0	0.05	1	1	0	0	1	1	1.2	1	6	0	2
1	0	68	5	1	1	1	1	1	0	0	2	0	0.15	1	1	1	2	2	1	2	2	4	0	2
1	0	68	5	1	1	1	1	1	0	0	2	0	0.15	1	1	1	2	2	1	2	2	4	0	2
1	0	71	6	1	1	5	1	1	1	0	0	1	0.2	2	1	0	0	2	5	9	2	30	1	4
1	1	60	5	1	1	5	2	2	2	2	2	2	0.16	2	2	2	2	2	1	7	2	12	1	4
1	1	73	6	1	1	73	1	1	0	0	0	0	0.1	1	1	0	2	2	1	10.9	1	9	1	4
1	0	71	6	1	2	99	1	1	0	0	2	1	0.03	1	2	1	0	2	2	6	2	6	0	3
1	1	65	5	1	5	105	1	1	1	0	0	1	0.1	1	1	0	1	1	1	16	1	12	1	4
1	0	62	5	1	1	72	1	1	1	0	0	1	0.05	0	1	0	0	1	2	4	1	1	0	2
1	1	66	5	1	1	1	1	1	1	0	0	0	0.3	1	1	1	2	2	3	12	1	38	1	4
1	1	66	5	1	1	1	1	1	1	0	0	0	0.3	1	1	1	2	2	3	12	1	38	1	4
1	0	73	6	1	1	71	2	2	2	2	2	2	0.16	2	2	2	2	2	1	2	2	6	0	2
1	1	78	6	1	1	70	2	2	2	2	2	2	0.16	2	2	2	2	2	2	6	2	6	0	3
1	0	58	4	1	1	5	1	1	1	0	0	0	0.1	1	0	0	2	2	1	18.5	1	9	1	4
1	1	54	4	1	1	11	1	1	1	0	0	0	0.1	1	1	0	2	2	1	3.6	1	5	0	2
1	0	61	5	1	1	11	1	1	1	0	0	0	0.1	1	1	0	0	1	1	2.8	1	3	0	2
1	1	47	3	1	1	11	1	1	1	0	0	0	0.15	1	1	0	0	1	1	8	1	3	0	3
1	0	72	6	1	1	7	1	1	1	0	0	0	0.1	1	1	0	2	2	1	2.8	1	6	0	2
1	1	52	4	1	1	7	2	2	2	2	2	2	0.16	2	2	2	2	2	1	7	2	4	1	4
1	0	46	3	1	1	7	1	1	1	0	0	0	0.1	1	2	0	2	2	1	4	1	7	0	2
1	0	47	3	1	1	7	1	1	1	0	0	1	0.1	1	1	0	1	1	1	0.8	1	4	0	2
1	1	63	5	1	2	98	1	0	1	0	0	1	0.3	1	1	0	2	2	2	11	2	4	1	4
1	0	53	4	1	1	7	1	1	0	0	0	0	0.4	2	1	0	2	2	1	3	3	80.6	1	4
1	1	56	4	1	1	10	1	1	0	0	0	0	0.2	0	1	0	0	1	2	7.8	1	14	1	4
1	1	78	6	1	1	10	1	1	0	0	2	0	0.08	2	2	0	2	2	2	13	1	9	1	4
1	1	74	6	1	1	10	1	1	1	0	0	0	0.1	1	1	0	0	1	1	7.5	1	9.5	1	4
1	0	75	6	1	1	10	1	1	1	0	0	0	0.08	1	1	0	0	1	1	3.8	1	14.2	1	4
1	0	59	4	1	1	3	1	1	1	0	0	1	0.04	1	2	0	2	2	2	4.5	1	6	0	3
1	0	52	4	1	1	1	1	1	0	0	0	1	0.2	1	1	1	0	1	1	7	2	4	1	4
1	0	52	4	1	4	1	1	1	0	0	0	1	0.2	1	1	1	0	1	1	7	2	4	1	4
1	1	68	5	1	2	98	1	1	1	1	1	1	0.05	1	1	1	2	2	1	1.1	2	4	0	1
1	1	58	4	1	4	1	2	2	2	2	2	2	0.16	2	2	2	2	2	2	7	2	4	1	4
1	1	58	4	1	4	1	2	2	2	2	2	2	0.16	2	2	2	2	2	2	7	2	4	1	4
1	0	50	4	1	1	3	1	1	1	0	0	0	0.3	1	1	0	0	1	3	2	2	4	0	1
1	0	60	5	1	1	3	1	1	1	0	0	0	0.3	1	1	0	0	1	1	17	1	18	1	4
1	1	58	4	1	2	98	1	1	1	0	0	0	0.05	2	1	1	2	2	2	2	1	4	0	2
1	0	50	4	1	3	100	1	1	1	0	0	0	0.1	0	2	0	2	2	1	1.5	1	3	0	1
1	1	56	4	1	1	3	2	2	2	2	2	2	0.16	2	2	2	2	2	1	7	1	4	1	4
1	0	71	6	1	1	3	1	1	1	0	0	0	0.01	1	1	0	0	0	1	3.3	1	3	0	2
1	1	70	6	1	1	3	1	1	1	0	0	1	0.08	1	1	0	2	1	1	2.5	1	6	0	2
1	1	58	4	1	1	3	0	1	0	0	0	1	0.15	0	1	0	0	1	2	2	1	4	0	2
1	1	64	5	1	3	100	2	2	2	2	2	2	0.16	2	2	2	2	2	1	7	1	4	1	4
1	1	64	5	1	1	3	1	1	1	0	0	0	0.1	2	1	0	1	1	1	4.5	1	4	0	2
1	1	79	6	1	1	3	1	1	1	0	0	0	0.1	1	1	0	1	1	1	2.5	1	6	0	2
1	1	64	5	1	1	3	1	1	1	0	0	0	0.08	1	1	0	0	1	1	4.8	1	6	0	2
1	1	50	4	1	1	3	1	1	1	0	0	0	0.2	1	1	0	0	1	1	7	1	7	1	4
1	0	83	7	1	1	3	1	1	1	0	0	0	0.15	1	2	0	0	1	1	6	1	6	0	3
1	1	62	5	1	1	3	2	2	2	2	2	2	0.16	2	2	2	2	2	1	7	1	4	1	4
1	0	54	4	1	1	3	1	1	1	0	0	0	0.1	1	1	0	1	1	1	4.5	1	4	0	2
1	0	68	5	1	1	69	1	1	0	0	2	1	0.05	2	0	2	2	2	3	11.5	1	4	1	4
1	0	64	5	1	1	68	1	1	1	0	2	0	0.15	2	1	1	2	2	2	2	1	4	0	2
1	0	57	4	1	1	18	2	2	2	2	2	2	0.16	2	2	2	2	2	2	7	1	4	1	4
1	0	61	5	1	1	18	1	1	1	0	2	1	0.02	1	2	0	2	2	1	4.8	1	7	0	2
1	1	51	4	1	2	98	2	2	2	2	2	2	0.16	2	2	2	2	2	4	2	1	4	0	1
1	1	59	4	1	1	67	1	1	1	0	0	0	0.05	1	1	0	1	1	1	2.4	1	6	0	2
1	0	67	5	1	1	66	1	1	1	0	0	0	0.1	2	2	0	2	2	1	4	1	4	0	2
1	0	66	5	1	1	65	1	1	1	0	0	0	0.05	1	1	0	1	1	1	13	1	4	1	4
1	1	53	4	1	1	64	1	1	1	0	0	0	0.1	1	1	0	0	1	3	3	1	11	1	4
1	1	37	2	1	3	101	1	1	1	0	0	1	0.1	1	1	0	0	1	1	2.5	1	7.1	0	3
1	0	66	5	1	1	63	1	1	1	0	0	1	0.1	1	1	1	0	2	1	12	2	3	1	4
1	1	52	4	1	1	1	2	2	2	2	2	2	0.16	2	2	2	2	2	2	7	1	4	1	4
1	1	52	4	1	3	1	2	2	2	2	2	2	0.16	2	2	2	2	2	2	7	1	4	1	4
1	0	52	4	1	1	61	1	1	1	0	0	1	0.05	2	2	0	0	2	2	13.4	1	2	1	4
1	1	60	5	1	5	104	2	2	2	2	2	2	0.16	2	2	2	2	2	1	7	1	4	1	4
1	0	46	3	1	1	62	1	1	1	2	2	0	0.03	2	2	0	2	1	1	1.5	1	3	0	1
1	1	58	4	1	1	9	1	1	1	0	2	1	0.1	2	2	0	2	2	1	4.8	1	7	0	3
1	1	51	4	1	1	9	1	1	1	0	0	0	0.05	1	1	0	0	1	1	10.5	1	3	1	4
1	1	53	4	1	1	9	2	2	2	2	2	2	0.16	2	2	2	2	2	1	7	1	4	1	4
1	0	58	4	1	1	9	1	1	1	0	0	0	0.05	1	1	0	2	2	3	4	1	4	0	2
1	0	71	6	1	1	17	1	1	1	0	0	0	0.05	2	2	0	0	2	1	6.5	1	6	0	3
1	1	57	4	1	1	17	2	2	2	2	2	2	0.16	2	2	2	2	2	1	7	1	4	1	4
1	0	76	6	1	1	60	1	1	1	0	0	1	0.05	0	1	0	0	0	1	6	1	6	0	3
1	1	62	5	1	1	1	1	1	0	0	2	1	0.2	2	2	0	0	2	1	7	1	4	1	4
1	1	62	5	1	3	1	1	1	0	0	2	1	0.2	2	2	0	0	2	1	7	1	4	1	4
1	0	65	5	1	1	59	1	1	1	0	0	1	0.1	2	1	0	0	1	2	12	1	4	1	4
1	0	69	5	1	1	58	2	2	2	2	2	2	0.16	2	2	2	2	2	1	7	1	4	1	4
1	1	54	4	1	1	6	2	2	2	2	2	2	0.16	2	2	2	2	2	1	6.5	1	15	1	4
1	1	57	4	1	1	6	1	1	1	2	2	1	0.6	2	1	0	2	2	1	6.7	1	6	1	4
1	1	61	5	1	1	1	1	1	1	0	0	1	0.1	0	1	0	0	2	2	5.5	1	7	1	4
1	1	61	5	1	3	1	1	1	1	0	0	1	0.1	0	1	0	0	2	2	5.5	1	7	1	4
1	1	59	4	1	1	6	1	1	1	0	0	0	0.2	1	1	0	0	1	3	1	1	4	0	1
1	1	60	5	1	1	6	1	1	1	2	2	2	0.3	1	1	2	2	2	1	16	1	4	1	4
1	1	74	6	1	1	6	1	1	1	0	0	0	0.06	1	1	0	1	1	2	6.5	3	7.1	1	4
1	0	39	2	1	1	57	1	1	1	0	2	0	0.03	1	2	0	2	2	1	2	1	3	0	1
1	1	43	3	1	5	102	1	1	1	0	0	0	0.1	1	1	0	1	1	1	8	3	9.5	1	4
1	1	58	4	1	1	56	1	1	1	0	2	0	0.5	1	1	0	1	1	1	22	1	4	1	4
1	0	57	4	1	1	55	1	1	1	0	0	0	0.02	1	1	0	0	1	1	4	1	4	0	2
1	0	71	6	1	1	16	1	1	1	0	0	0	0.2	1	1	1	2	1	1	4	1	6	0	3
1	0	58	4	1	1	16	1	1	1	0	0	0	0.5	2	1	0	2	1	2	11	1	4	1	4
1	1	75	6	1	1	15	1	1	1	0	0	0	0.2	1	1	0	0	1	1	7	1	16	1	4
1	0	50	4	1	1	15	1	1	1	0	0	1	0.1	0	1	0	0	1	4	6.8	1	5	1	4
1	0	61	5	1	2	98	1	1	0	0	0	0	0.04	1	1	0	0	1	2	10.8	1	5	1	4
1	0	50	4	1	1	54	1	1	1	0	0	0	0.03	1	1	0	2	1	1	5	1	4.7	0	3
1	0	69	5	1	1	14	1	1	1	0	0	1	0.1	2	1	2	2	2	2	2.2	1	6	0	3
1	1	58	4	1	1	14	2	2	2	2	2	2	0.16	2	2	2	2	2	3	7	1	6	1	4
1	0	69	5	1	1	53	2	2	2	2	2	2	0.16	2	2	2	2	2	3	7	1	4	1	4
1	1	42	3	1	1	2	2	2	2	2	2	2	0.16	2	2	2	2	2	2	4	1	4	0	2
1	1	57	4	1	1	2	1	1	1	0	0	0	0.3	2	1	0	2	2	1	0.6	1	4	0	1
1	1	55	4	1	1	2	1	1	1	1	0	0	0.3	1	1	0	0	1	1	8	1	40	1	4
1	0	59	4	1	1	2	1	1	1	0	0	0	0.05	1	2	2	2	2	1	2.5	1	4	0	2
1	0	52	4	1	1	2	1	1	1	0	2	1	0.3	2	1	0	2	2	1	15	1	5	1	4
1	1	75	6	1	1	2	1	1	1	0	2	1	0.02	2	2	2	2	2	4	10.5	1	6	1	4
1	0	58	4	1	5	103	1	1	0	0	0	0	0.1	1	1	0	1	1	1	2.5	3	15	0	3
1	1	51	4	1	1	2	1	1	1	0	0	0	0.03	1	0	0	0	1	3	4.6	1	6	0	3
1	1	59	4	1	1	2	1	1	1	0	2	1	0.1	2	2	0	2	2	3	8	1	10	1	4
1	0	60	5	1	1	2	1	1	1	0	0	1	0.4	2	1	0	2	2	3	7	1	4	1	4
1	1	51	4	1	2	98	1	1	1	0	0	1	0.05	1	1	0	1	1	2	1.5	1	2	0	1
1	0	59	4	1	1	2	1	1	1	0	0	0	0.2	1	1	0	0	0	1	22	1	4	1	4
1	0	66	5	1	1	2	2	2	2	2	2	2	0.16	2	2	2	2	2	1	4	1	4	0	2
1	1	64	5	1	1	2	2	2	2	2	2	2	0.16	2	2	2	2	2	1	4	1	4	0	2
1	1	50	4	1	1	2	1	1	1	0	0	0	0.02	1	1	0	1	1	1	3.1	2	4	0	2
1	0	59	4	1	1	2	0	1	0	0	0	0	0.2	1	1	0	2	0	1	7	1	14	1	4
1	1	30	2	1	1	2	1	1	1	0	0	0	0.05	1	1	0	1	1	1	3	1	3	0	2
1	0	54	4	1	1	1	1	1	1	0	1	0	0.1	1	1	1	0	1	1	4	1	4	0	2
1	0	54	4	1	4	1	1	1	1	0	1	0	0.1	1	1	1	0	1	1	4	1	4	0	2
1	0	55	4	1	1	52	1	1	1	0	0	1	0.1	2	2	1	2	2	1	2.6	1	8	0	3
1	1	63	5	1	2	98	1	1	1	0	0	1	0.3	1	1	0	2	1	2	9	2	10	1	4
1	1	82	7	1	1	51	1	1	1	0	0	1	0.1	2	1	0	0	1	2	3.5	1	6	0	2
1	1	61	5	1	1	50	1	1	1	0	0	0	0.08	1	1	0	2	2	3	4	1	4	0	2
1	1	51	4	1	1	49	1	1	1	0	0	1	0.7	1	1	1	0	1	1	11	1	7	1	4
1	0	37	2	1	1	48	1	1	1	0	0	0	0.15	2	2	0	2	2	3	6	1	7	1	4
1	1	51	4	1	1	47	1	1	1	0	0	1	0.1	1	1	0	0	1	1	0.5	2	4	0	1
1	1	77	6	1	1	46	1	1	1	0	0	0	0.3	1	1	0	0	1	1	15.3	2	7	1	4
1	1	82	7	1	1	45	1	1	1	0	0	0	0.35	1	0	0	0	0	3	4	3	35	1	4
1	0	76	6	1	1	44	1	1	1	0	0	1	0.04	1	1	1	1	1	2	7	1	6	1	4
1	1	61	5	1	2	98	1	1	1	0	0	0	0.2	1	1	1	1	0	3	0.5	1	4	0	1
1	1	60	5	1	2	98	1	1	1	0	0	1	0.1	1	1	0	0	1	2	5	1	6	0	3
1	1	64	5	1	5	102	1	1	1	0	0	1	0.2	1	1	0	0	1	1	2.5	1	7	0	3
1	1	59	4	1	1	43	1	1	1	2	2	0	0.5	1	1	2	2	2	1	16.2	1	6	1	4
1	1	52	4	1	1	42	2	2	2	2	2	2	0.16	2	2	2	2	2	2	0.5	1	4	0	1
1	1	55	4	1	1	41	1	1	1	0	2	0	0.08	2	1	0	2	2	1	3.5	1	4	0	2
1	1	52	4	1	5	102	1	1	1	0	0	1	0.1	1	2	0	2	2	1	5	1	4	0	2
1	1	43	3	1	1	40	1	1	1	0	0	0	0.4	0	1	0	0	0	1	15	1	112	1	4
1	0	76	6	1	1	39	1	1	1	0	0	0	0.03	1	1	0	0	2	1	1.5	1	6	0	2
1	1	69	5	1	1	13	1	1	0	0	0	0	0.2	1	1	0	0	1	2	8	1	4	0	3
1	0	51	4	1	1	13	1	1	0	0	0	1	0.04	1	1	1	2	1	3	2.5	1	4	0	2
1	1	47	3	1	1	36	2	2	2	2	2	2	0.16	2	2	2	2	2	1	2.5	1	4	0	2
1	0	65	5	1	1	38	2	2	2	2	2	2	0.16	2	2	2	2	2	1	2.5	1	4	0	2
1	1	68	5	1	1	37	1	1	1	0	2	0	0.13	2	1	0	2	2	1	17.3	1	10	1	4
1	1	61	5	1	1	34	1	1	1	0	0	0	0.05	1	1	0	0	1	1	4.2	1	4	0	2
1	0	70	6	1	1	35	1	1	1	0	0	0	0.05	0	1	0	1	1	1	2	1	9	0	3
1	0	57	4	1	1	33	2	2	2	2	2	2	0.16	2	2	2	2	2	2	2.5	1	4	0	2
1	0	50	4	1	1	32	1	1	1	0	0	0	0.2	0	1	0	0	1	1	5.6	1	3	0	3
1	0	51	4	1	1	1	1	1	1	0	0	0	0.4	1	1	1	1	1	4	7	1	4	1	4
1	0	51	4	1	4	1	1	1	1	0	0	0	0.4	1	1	1	1	1	4	7	1	4	1	4
1	1	65	5	1	1	31	1	1	1	0	0	1	0.4	1	1	0	0	1	2	14	1	6	1	4
1	1	71	6	1	1	30	2	2	2	2	2	2	0.16	2	2	2	2	2	1	16.7	1	6	1	4
1	1	57	4	1	1	12	1	1	0	0	0	1	0.05	1	1	0	0	1	2	7	1	9.5	1	4
1	1	80	7	1	1	12	1	1	1	0	0	0	0.3	0	1	0	2	1	1	17	1	6	1	4
1	0	65	5	1	1	29	1	1	1	0	0	0	0.2	1	1	0	0	1	1	9	1	14	1	4
1	0	55	4	1	1	28	1	1	1	0	0	0	0.01	1	1	0	0	1	1	10.8	1	4	1	4
1	1	57	4	1	1	1	1	1	1	0	0	0	0.6	1	1	0	0	1	1	12.5	1	6	1	4
1	1	61	5	1	5	106	1	1	1	1	0	1	0.2	1	1	1	1	1	1	3	1	2	0	2
1	1	54	4	1	1	27	1	1	1	0	0	0	0.07	1	1	0	0	1	1	3.5	1	4	0	2
1	0	67	5	1	1	26	1	1	1	0	0	0	0.25	1	1	0	0	1	1	5	1	17	1	4
1	1	83	7	1	1	25	1	1	1	0	0	1	0.4	1	1	0	0	1	3	7.5	1	6	1	4
1	1	78	6	1	1	24	1	1	1	0	0	0	0.04	1	2	0	2	2	1	13.3	1	6	1	4
1	1	84	7	1	1	23	1	1	1	0	0	1	0.03	1	1	1	2	2	1	0.4	1	1	0	1
1	1	73	6	1	1	22	2	2	2	2	2	2	0.16	2	2	2	2	2	1	1.4	1	6	0	2
1	1	57	4	1	3	1	1	1	1	0	0	0	0.6	1	1	0	0	1	1	12.5	1	6	1	4
2	1	35	2	0	0	0	1	1	1	0	0	0	0.15	0	0	0	2	2	1	8	1	6	1	4
2	1	48	3	0	0	0	1	1	1	0	0	1	0.2	0	1	0	0	1	2	4	2	4	0	2
2	0	49	3	0	0	0	2	2	2	2	2	2	0.16	0	2	2	2	2	1	15	2	4	1	4
2	0	32	2	0	0	0	2	2	2	2	2	2	0.16	0	2	2	2	2	1	11	2	6	1	4
2	1	45	3	0	0	0	1	1	1	0	0	0	0.01	0	1	1	0	0	5	0.5	2	4	0	1
2	1	55	4	0	0	0	1	1	1	0	2	1	0.03	0	2	1	2	2	1	1.6	1	4	0	1
2	0	77	6	0	0	0	1	1	0	0	0	1	0.2	1	1	0	0	1	2	4.5	1	6	0	2
2	1	36	2	0	0	0	2	2	2	2	2	2	0.16	0	2	2	2	2	1	7	2	2.5	1	4
2	1	55	4	0	0	0	2	2	2	2	2	2	0.16	0	2	2	2	2	2	7	1	4	1	4
2	0	42	3	0	0	0	1	1	1	0	0	1	0.05	0	1	0	2	2	1	0.7	1	4	0	2
2	1	34	2	0	0	0	2	2	2	2	2	2	0.16	0	2	2	2	2	3	4	1	2.5	0	2
2	1	53	4	0	0	0	1	1	1	0	0	1	0.1	0	1	1	1	1	1	8	2	3	0	3
2	1	39	2	0	0	0	1	1	1	0	0	1	0.05	0	1	1	0	2	5	1	1	2.5	0	1
2	0	21	1	0	0	0	2	2	2	2	2	2	0.16	0	2	2	2	2	1	4	1	3	0	2
2	0	71	6	0	0	0	1	1	1	0	0	0	0.05	0	1	0	0	1	2	5.5	2	4.7	0	3
2	0	60	5	0	0	0	1	1	1	0	0	0	0.03	0	1	0	0	0	1	2	1	12	1	4
2	1	88	7	0	0	0	1	0	0	0	0	1	0.1	1	1	1	0	0	2	6.5	1	8	1	4
2	1	49	3	0	0	0	1	1	0	0	2	0	0.05	0	1	0	2	2	2	0.2	1	2	0	1
2	0	66	5	0	0	0	1	1	1	0	0	1	0.15	0	1	0	0	2	1	0.3	1	4	0	1
2	0	53	4	0	0	0	1	1	1	0	0	0	0.1	0	1	0	0	1	1	0.5	1	4	0	1
2	1	57	4	0	0	0	1	1	1	0	0	0	0.03	0	2	0	2	2	1	10	2	14.2	1	4
2	0	63	5	0	0	0	1	1	1	0	0	0	0.05	0	1	0	0	1	1	13	1	4	1	4
2	1	57	4	0	0	0	1	1	1	0	0	0	0.02	0	1	0	0	1	1	2.5	1	4	0	2
